# Supplementary material for: A 1-year aerosol chemical speciation monitor (ACSM) source analysis of organic aerosol particle contributions from anthropogenic sources after long-range transport at the TROPOS research station Melpitz
Source: Copernicus journal article supplement (doi:10.5194/acp-23-6963-2023), 2023-06-23
Supplement: Supplementary file 1 [file acp-23-6963-2023-supplement.pdf]

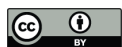

*Supplement of*

**A 1-year aerosol chemical speciation monitor (ACSM) source analysis of organic aerosol particle contributions from anthropogenic sources after long-range transport at the TROPOS research station Melpitz**

**Samira Atabakhsh et al.**

*Correspondence to:* Hartmut Herrmann ([herrmann@tropos.de](mailto:herrmann@tropos.de))

The copyright of individual parts of the supplement might differ from the article licence.

## 1 **1 Source apportionment of organic aerosol**

2 This work conducted the most advanced source apportionment analysis following a standardized protocol developed by Chen  
3 et al., (2022). In this study, to better identify the organic aerosol (OA) sources in Melpitz, positive matrix factorization (PMF)  
4 was applied on each separate season, following a standardized protocol developed by Chen et al., (2022). Since the  
5 measurements were taken between September 2016 and August 2017 (12 months), therefore dataset was split into four  
6 meteorological seasons (i.e., fall (September-November); winter (December-February); spring (March-May), and summer  
7 (June-August)). Details of the rolling PMF can be found in Chen et al., (2022).

### 8 **1.1 PMF pre-test**

9 First, to estimate the potential sources in different seasons, unconstrained PMF was applied with different factors (from 4 to  
10 6) runs on each season separately. Considering the residential heating during winter time, it was estimated to have the  
11 maximum coal combustion OA (CCOA) and biomass burning OA (BBOA) emissions in this season. Therefore, in order to  
12 identify and split the sources of solid fuels, the winter season was comprehensively analyzed. However, clear primary factor  
13 profiles did not result from unconstrained PMF during the winter season. Therefore, profiles of two primary factors as  
14 hydrocarbon-like OA (HOA) and BBOA were constrained by various *a-values* and applying the reference profiles by Crippa  
15 et. Al. (2013) and Ng et al. (2011a) for HOA and BBOA, respectively as suggested by Chen et al. (2021). After HOA and  
16 BBOA constraining, a third primary factor could be dedicated as well. This new primary factor presented signals which are  
17 common in CCOA profiles (e.g., signals from unsaturated hydrocarbons and polycyclic aromatic hydrocarbons (PAHs)). The  
18 bootstrap resampling strategy was applied to the input data matrix to check the reliability of the discovered CCOA factor  
19 (Davison and Hinkley, 1997). Three primary factors (HOA, BBOA, and resulted CCOA) were used to constrain the PMF  
20 solution. Finally, based on residual analysis, it was possible to determine the number of oxygenated OA (OOA). When the  
21 number of factors was increased to 6 or more, either the OOAs or the CCOA were split. As a result, throughout the  
22 measurements, the five-factor solution with three primary factors and two OOA factors was preferred.  $\mu\text{g m}^{-3}$

23 PMF with the rolling window approach was performed based on these seasonal pre-tests. The following section describes the  
24 specific settings used in this study. Since this approach resulted in an immense number of single PMF solutions, it was  
25 necessary to identify and distinguish environmentally reasonable PMF solutions, by using properly selected user-defined  
26 criteria. The unconstrained factors were also identified and sorted using these criteria. The particular details of the factors are  
27 discussed further below.

28 The correlation of  $\text{NO}_x$  with HOA factor is used as a HOA criterion since it is known as a typical tracer for traffic emissions.  
29 However, to determine if the difference in this correlation was considerable in comparison with the correlation of  $\text{NO}_x$  with  
30 other factors, a *t-test* was performed that solutions with a *p-value*  $\leq 0.05$  were considered acceptable for all the criteria. For the  
31 BBOA factor, the explained variation of *m/z* 60 was selected as a criterion, since BBOA is typically composed of anhydrous

32 sugar fragments (e.g., levoglucosan fragments  $m/z$  60 and 73). Moreover, the correlation of levoglucosan with BBOA was  
33 used as the second criterion for this factor. For the CCOA factor, unsaturated hydrocarbon and polycyclic aromatic  
34 hydrocarbon (PAH) signals at  $m/z$  41, 51, 53, 55, 69, 77, 91, and 115 characterize coal combustion emissions (Dall'Osto et al.,  
35 2013; Elser et al., 2016; Lin et al., 2017; Xu et al., 2020). Therefore, as a CCOA criterion, the explained variation of  $m/z$  115  
36 was selected. Further, the  $R^2$  value of the time series of POA factors (HOA, BBOA, and CCOA) vs equivalent black carbon  
37 (eBC-PM<sub>1</sub>) was used for them as other criteria. The unconstrained OOA factors were split by less oxidized oxygenated OA  
38 (LO-OOA) and more oxidized oxygenated OA (MO-OOA). We used  $f_{44}$  for the MO-OOA as suggested by (Chen et al., 2021)  
39 which LO-OOA simply followed by  $f_{43}$ .

## 40 1.2 Rolling PMF

41 Following the analysis of the seasonal PMF solutions (i.e., pre-test PMF), rolling PMF was carried out. The shift parameter  
42 (the number of days), the width of the window (the number of consecutive days), and the number of repetitions for each PMF  
43 window define the rolling PMF approach (Canonaco et al., 2021). Here, to detect source variation, the PMF window with a  
44 length of 14 days with a 1-day shift was applied as suggested by (Chen et al., 2021). To compare the four different PMF  
45 analyses, the same criteria and thresholds have been used.

46 To investigate the statistical uncertainties of the rolling PMF, repeats per window are needed. However, statistical uncertainty  
47 could be evaluated by using the bootstrap strategy, which resamples the PMF input at random. When the factors are constrained  
48 by prior knowledge (i.e., reference profiles or external time series), a sensitivity analysis of the  $a$ -value must be done to  
49 investigate the rotational ambiguity. The  $a$ -values in this study were selected at random for each PMF repetition, ranging from  
50 0 to 0.4 for HOA and BBOA, and 0.5 for CCOA ( $\Delta a = 0.1$  for all). Based on the criteria described above, 15165 solutions  
51 (42.36 %) of the overall 35800 single PMF runs were produced in the rolling PMF approach. All measured time points were  
52 modeled within the context of a rolling PMF. As presented in Fig. S1, no systematic errors were observed during the evaluation  
53 of the scaled residual over time and variables ( $m/z$ ). The uncertainty is described as the logarithmic probability density function  
54 (pdf) of the standard deviation of each time point  $i$  divided by the mean mass concentration of each time point  $i$ . As time points  
55 with a low signal-to-noise ratio would pull the error calculations, the lognormal distribution was chosen to better represent the  
56 PMF errors. As shown in Fig. S2, the relative PMF errors are  $\pm 32.5$  %,  $\pm 27.6$  %,  $\pm 28.9$  %,  $\pm 38.2$  % and  $\pm 24.4$  % for HOA,  
57 BBOA, CCOA, LO-OOA and MO-OOA, respectively.

58

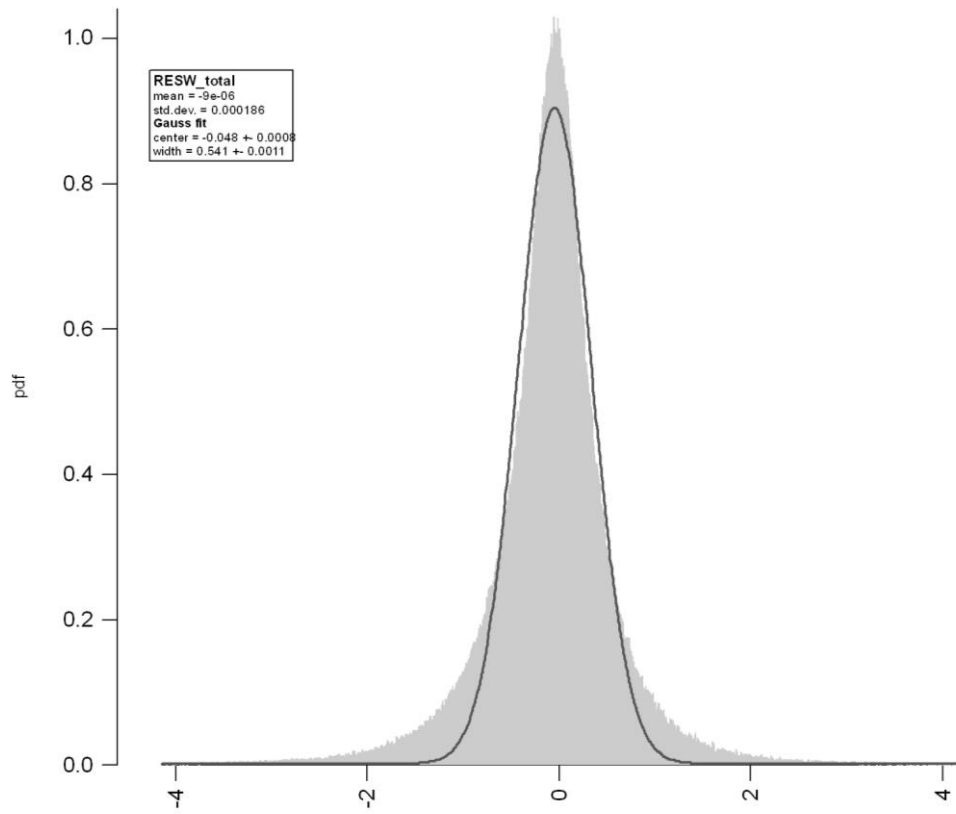

59  
60  
61  
62

**Fig. S1: Analysis of the scaled residuals for the total scaled residuals.**

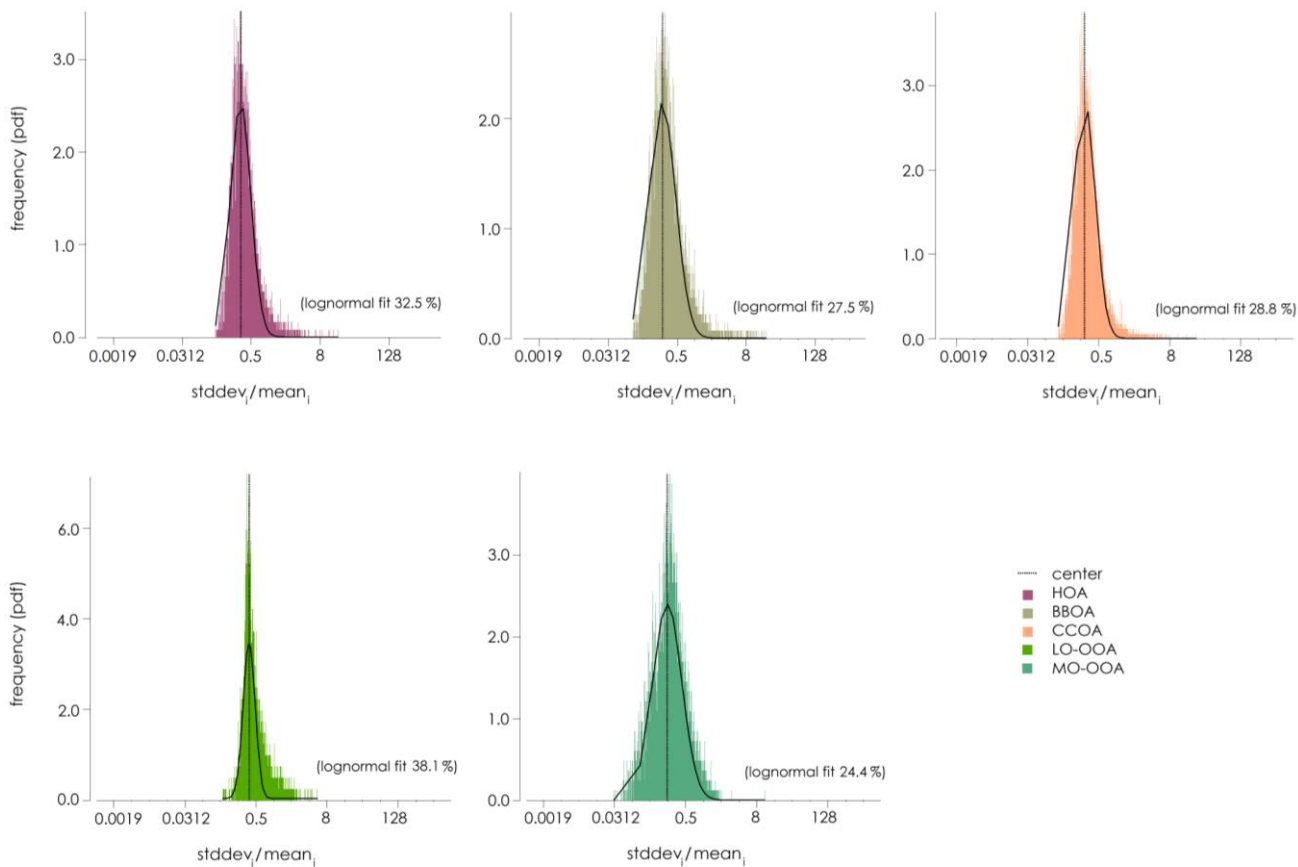

63  
64  
65  
66  
67  
68  
69  
70  
71  
72  
73  
74

**Fig. S2: PMF error estimation of the five resolved PMF factors represented as logarithmic probability density functions (pdf) of the standard deviations of each time point  $i$  divided by the mean mass concentration of each time point  $i$ .**

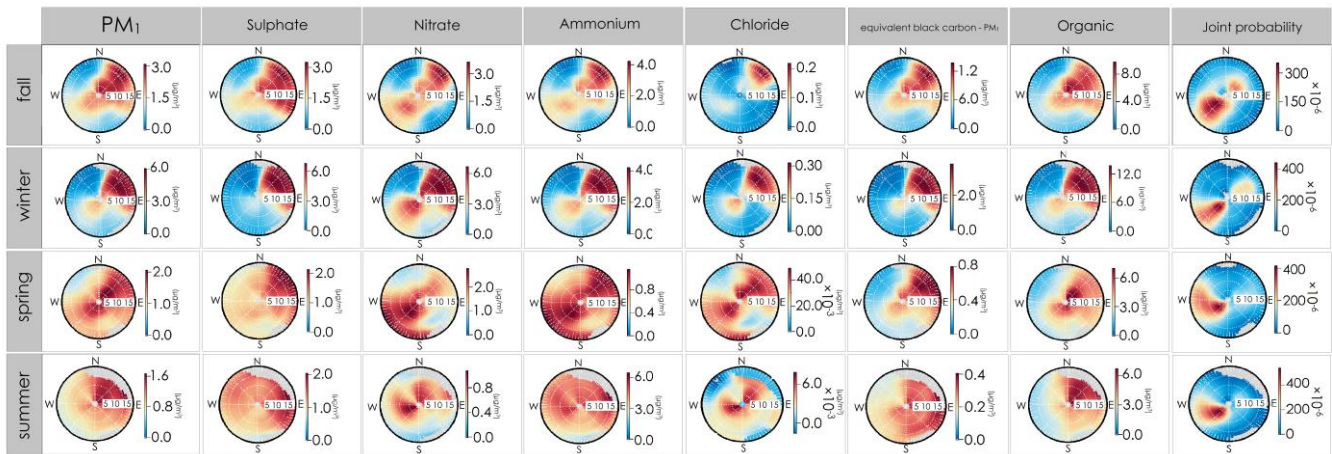

Fig. S3: Seasonal NWR plots for the different chemical compositions (in  $\mu\text{g m}^{-3}$ ).  $\text{PM}_{10}$  is the average of all the compositions.

75  
76  
77

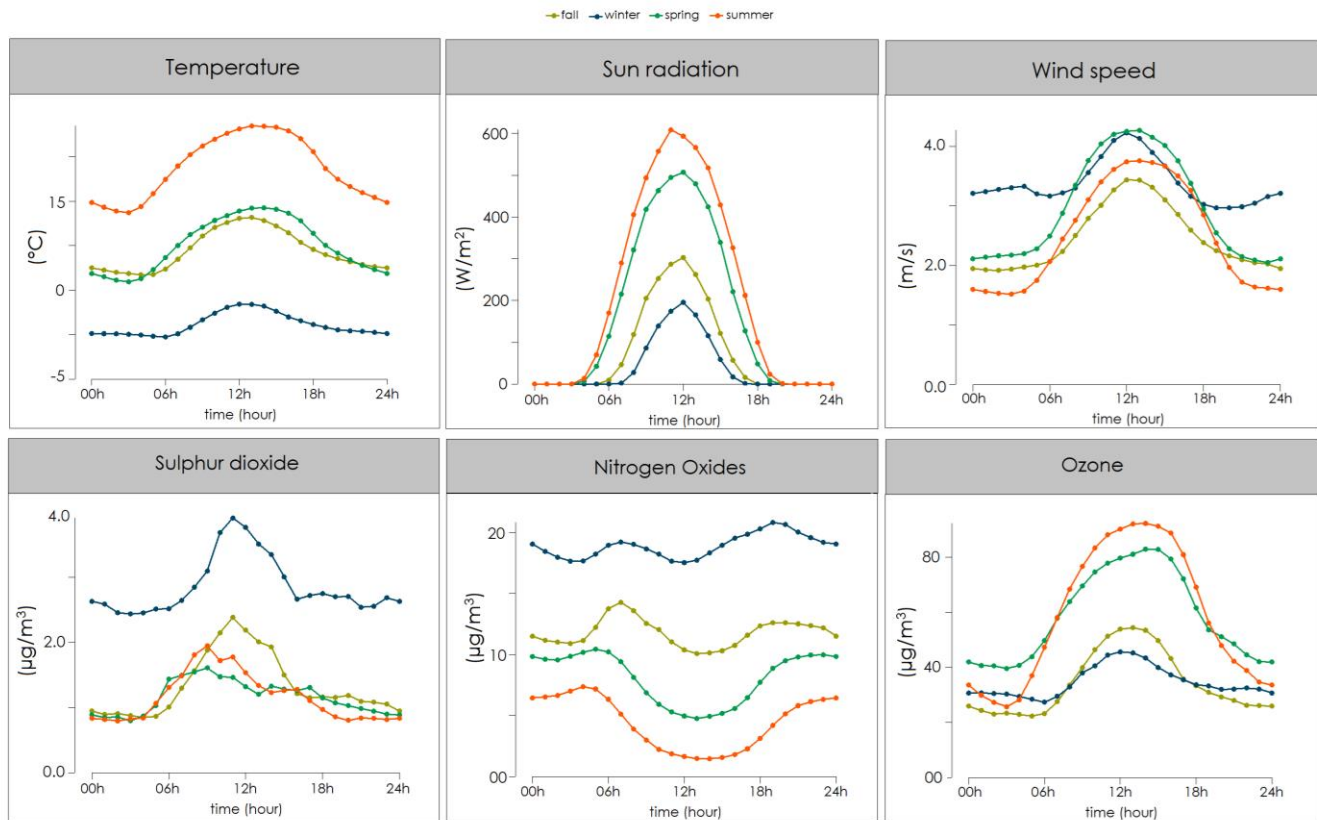

Fig. S4: Seasonal diurnal cycle of Temperature, Sun radiation, Sulphur dioxide, Nitrogen Oxides, and Ozone.

78  
79  
80  
81  
82

83

**Table. S1: PM<sub>1</sub> seasonal mass fraction (%) of each ACSM species, and AMS study (Poulain et al, 2011).**

| Species                                  | Fall |     | Winter |     | Summer |     |
|------------------------------------------|------|-----|--------|-----|--------|-----|
|                                          | ACSM | AMS | ACSM   | AMS | ACSM   | AMS |
| Org                                      | 50   | 32  | 39     | 23  | 58     | 59  |
| SO <sub>4</sub> <sup>2-</sup>            | 16   | 17  | 15     | 18  | 20     | 22  |
| <b>ACSM</b> NO <sub>3</sub> <sup>-</sup> | 18   | 23  | 24     | 34  | 11     | 5   |
| NH <sub>4</sub> <sup>+</sup>             | 9    | 12  | 12     | 17  | 7      | 8   |
| Cl <sup>-</sup>                          | 0    | 0   | 1      | 2   | 0      | 0   |
| <b>MAAP</b> eBC-<br>PM <sub>1</sub>      | 6    | 10  | 9      | 6   | 4      | 6   |

84

85

86

**Table. S2: PM<sub>1</sub> seasonal mass concentration (µg m<sup>-3</sup>) of Poulain et al, (2020), and average from the current study.**

| Species                            | Fall | Winter | Summer | Spring | Average | the current study |
|------------------------------------|------|--------|--------|--------|---------|-------------------|
| <b>Org</b>                         | 3.83 | 4.58   | 4.41   | 4.28   | 4.27    | 4.84              |
| <b>SO<sub>4</sub><sup>2-</sup></b> | 1.53 | 1.86   | 1.37   | 1.41   | 1.54    | 1.67              |
| <b>NO<sub>3</sub><sup>-</sup></b>  | 2.24 | 3.79   | 0.90   | 3.07   | 2.50    | 2.16              |
| <b>NH<sub>4</sub><sup>+</sup></b>  | 1.10 | 1.63   | 0.65   | 1.35   | 1.18    | 1.11              |
| <b>Cl<sup>-</sup></b>              | 0.04 | 0.07   | 0.01   | 0.05   | 0.04    | 0.05              |
| <b>eBC-PM<sub>1</sub></b>          | 0.69 | 1.22   | 0.30   | 0.56   | 0.69    | 0.66              |
| <b>Tot</b>                         | 9.43 | 13.15  | 7.64   | 10.72  | 10.23   | 10.49             |

87

88

89

**Table. S3: Studies information: Current study, Crippa et al., 2014, van Pinxteren et al., 2016 and 2020.**

| Information                 | Current study                       | Crippa et al., 2014          | van Pinxteren et al.,<br>2016                                                         | van Pinxteren et al.,<br>2020                                                                   |
|-----------------------------|-------------------------------------|------------------------------|---------------------------------------------------------------------------------------|-------------------------------------------------------------------------------------------------|
| <b>Instrument</b>           | ACSM                                | AMS                          | Berner-type cascade impactor                                                          | Digitel DHA-80 high-volume filter samplers                                                      |
| <b>PM size</b>              | 1 µm                                | 1 µm                         | 0.05, 0.14, 0.42, 1.2, 3.5, and<br>10 µm                                              | 10 µm                                                                                           |
| <b>PM type</b>              | Organic                             | Organic                      | Total mass                                                                            | Total mass                                                                                      |
| <b>Data coverage</b>        | 1 year (Sep 2016-Aug2017)           | 2 spring, 1 fall             | 21 days per: 1 summer, 1<br>winter                                                    | 1 year (Nov2018- Oct2019)                                                                       |
| <b>Sources<br/>category</b> | HOA, BBOA, CCOA, LO-<br>OOA, MO-OOA | HOA, BBOA, LO-OOA,<br>MO-OOA | Crustal material, Salt,<br>Secondary I, II,<br>Biomass combustion, Coal<br>combustion | Traffic, Tr. Exhaust, CCOA,<br>BBOA, SA, Photochem,<br>Cooking, Spores, Urban dust,<br>Sea salt |

90

91

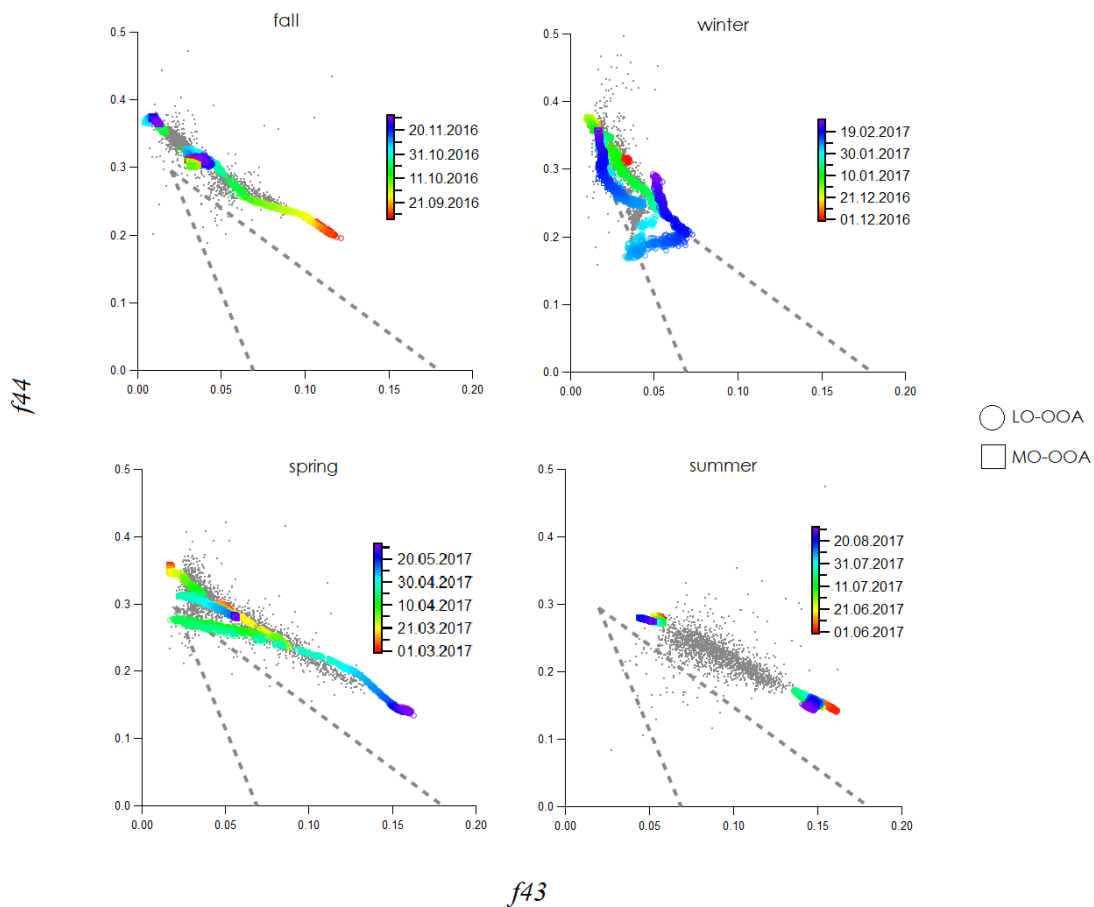

92

93

94 **Fig. S5:  $f_{44}$  vs.  $f_{43}$  for OOA factors (after subtraction of signals contributed by the primary HOA, BBOA, and CCOA factors as**  
 95 **shown in Eq. (S1) and (S2)) in hourly resolution, colour coded by date. The triangle plot established by Ng et al., (2010), depicts the**  
 96 **region where several PMF OOA from the last decade resided in the  $f_{44}$  vs  $f_{43}$  space**  
 97

98

$$\text{subtracted } f_{44} = \frac{\text{mass conc. of OOA @ } [m/z_{44}]}{\text{mass conc. of OOA + residual of total OA}} \quad (\text{S1})$$

99

100

$$\text{subtracted } f_{43} = \frac{\text{mass conc. of OOA @ } [m/z_{43}]}{\text{mass conc. of OOA + residual of total OA}} \quad (\text{S2})$$

101

102



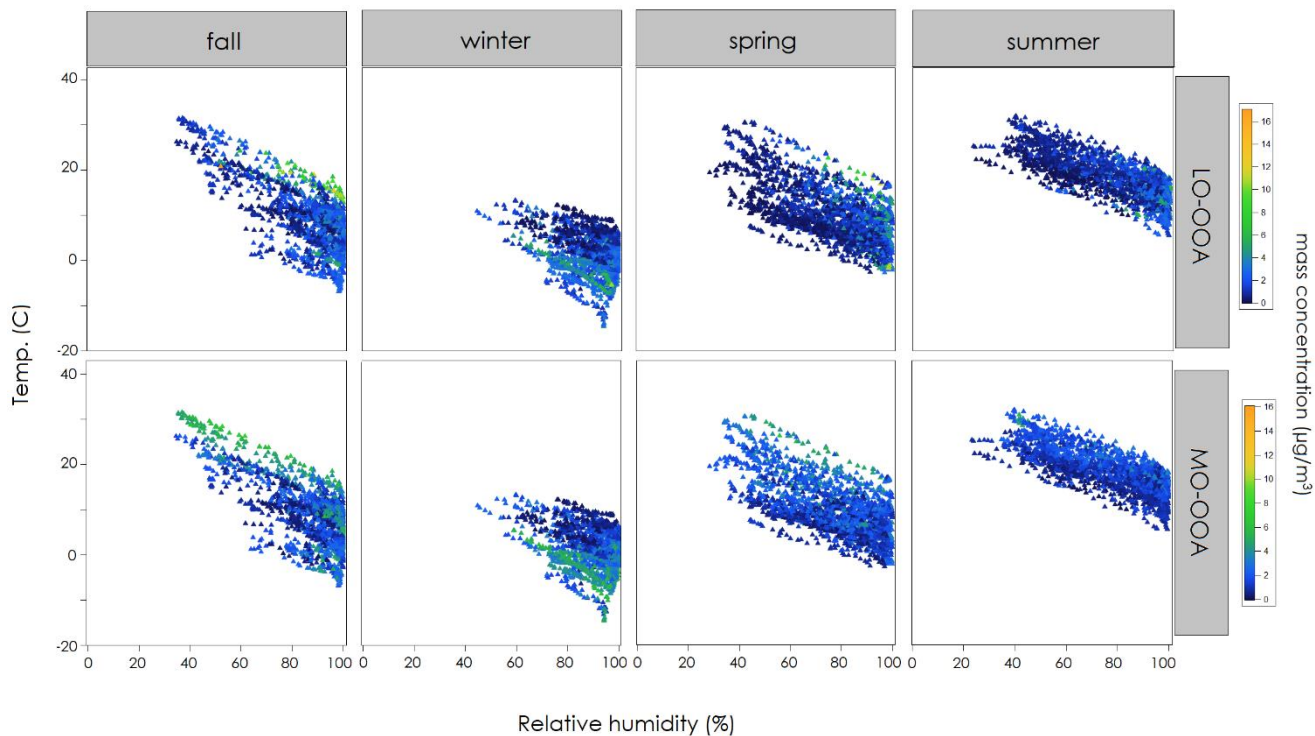

103  
104 **Fig. S6: Temperature (T) and relative humidity (RH) dependence variations of the mass loadings of two OOA fractions.**  
105  
106

107  
108  
109 **Table. S4: Linear regression coefficient for  $m_{HOA}$ ,  $m_{BBOA}$ , and  $m_{CCOA}$ , defined as a, b, and c for HOA, BBOA, and CCOA; respectively.**  
110  
111

| Factor          | Fall | Winter | Spring | Summer |
|-----------------|------|--------|--------|--------|
| <b>a</b> (HOA)  | 0.38 | 0.55   | 0.11   | 0.17   |
| <b>b</b> (BBOA) | 0.95 | 0.52   | 0.65   | 0.75   |
| <b>c</b> (CCOA) | 0.32 | 0.46   | 0.35   | 0.09   |

112  
113  
114  
115  
116  
117  
118  
119  
120

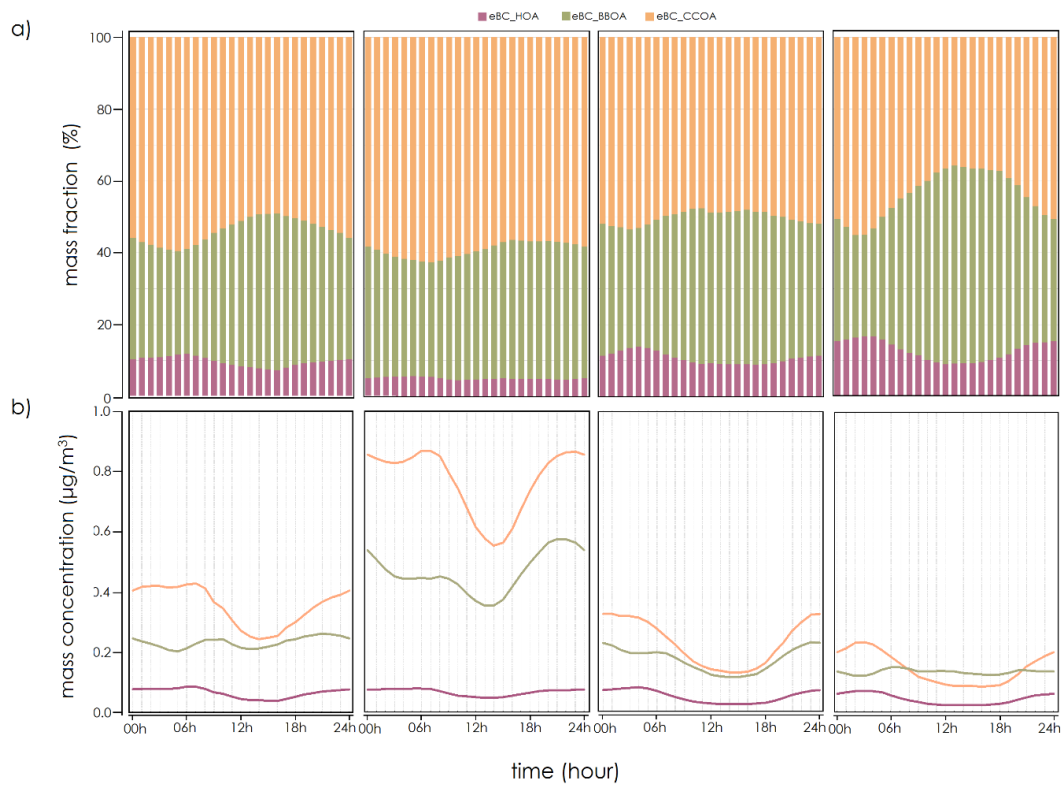

**Fig. S7: The diurnal variation of different eBC-PM<sub>1</sub>, a) mass fraction, b) mass concentration of the POA for different seasons.**

121  
122  
123  
124  
125

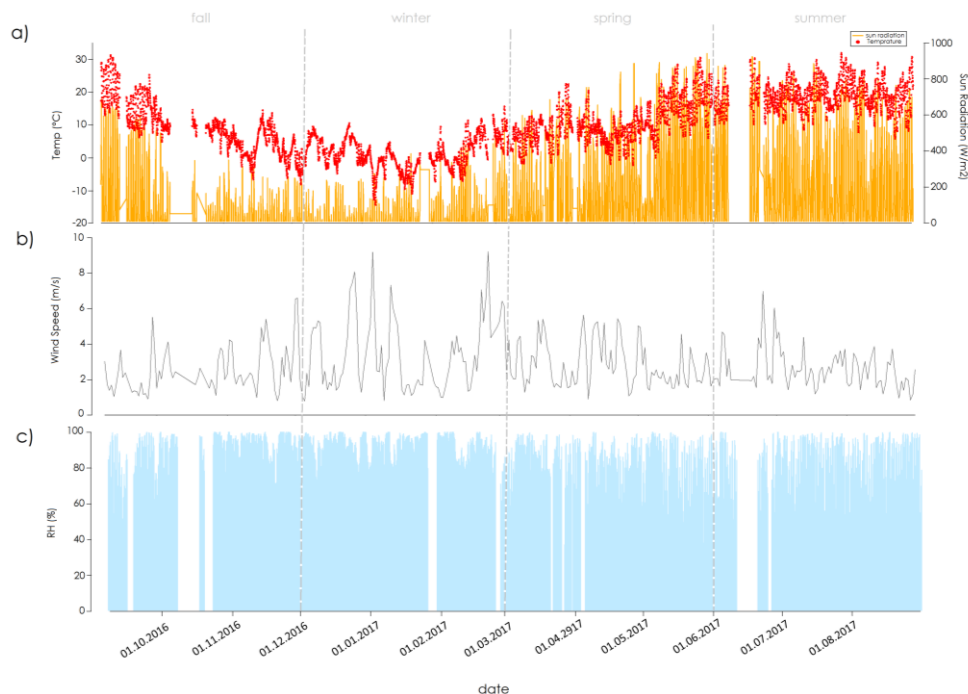

**Fig. S8: Time series of meteorological variables; a) hourly resolution of Temperature in red dots, Sun radiation in yellow line, b) daily resolution of Wind speed and c) hourly resolution of Relative Humidity (time is in UTC).**

**Table. S5: Main statistical details of the fifteen air mass types for PM<sub>1</sub> and PMF factors (CS=Cold Season, WS=Warm Season, ST=Stagnant, A=Anticyclonic, C=Cyclonic) based on mass concentration ( $\mu\text{g m}^{-3}$ ).**

| Main season                  | Airmass type | Wind direction | Vorticity    | Average mass concentration ( $\mu\text{g m}^{-3}$ ) |          |          |                 |                 |                              |                 |      |      |      |        |        |
|------------------------------|--------------|----------------|--------------|-----------------------------------------------------|----------|----------|-----------------|-----------------|------------------------------|-----------------|------|------|------|--------|--------|
|                              |              |                |              | eBC-HOA                                             | eBC-BBOA | eBC-CCOA | NO <sub>x</sub> | SO <sub>2</sub> | NH <sub>4</sub> <sup>+</sup> | Cl <sup>-</sup> | HOA  | BBOA | CCOA | LO_OOA | MO_OOA |
| Winter                       | CS-ST        | Stagnating     | Anticyclonic | 0.06                                                | 0.62     | 0.91     | 5.38            | 3.33            | 2.78                         | 0.14            | 0.35 | 0.97 | 1.89 | 2.73   | 2.73   |
|                              | CS-A1        | East           | Anticyclonic | 0.08                                                | 0.67     | 1.93     | 5.60            | 5.39            | 3.44                         | 0.24            | 0.49 | 1.06 | 4.01 | 2.72   | 3.45   |
|                              | CS-A2        | West           | Anticyclonic | 0.04                                                | 0.24     | 0.31     | 3.86            | 1.83            | 1.89                         | 0.13            | 0.25 | 0.38 | 0.65 | 1.77   | 1.97   |
|                              | CS-C1        | South          | Cyclonic     | 0.05                                                | 0.38     | 0.40     | 2.62            | 2.99            | 1.75                         | 0.06            | 0.30 | 0.61 | 0.84 | 2.17   | 3.77   |
|                              | CS-C2a       | South West     | Cyclonic     | 0.01                                                | 0.07     | 0.06     | 1.16            | 0.78            | 0.58                         | 0.03            | 0.07 | 0.11 | 0.13 | 0.30   | 0.72   |
|                              | CS-C2b       | West           | Cyclonic     | 0.01                                                | 0.04     | 0.05     | 0.35            | 0.74            | 0.26                         | 0.02            | 0.07 | 0.07 | 0.10 | 0.29   | 0.55   |
| Transition<br>(Spring/ Fall) | TS-A1        | North East     | Anticyclonic | 0.03                                                | 0.11     | 0.13     | 1.08            | 1.07            | 0.59                         | 0.04            | 0.17 | 0.17 | 0.27 | 1.03   | 1.31   |
|                              | TS-A2        | West           | Anticyclonic | 0.02                                                | 0.09     | 0.08     | 1.54            | 1.05            | 0.73                         | 0.03            | 0.11 | 0.15 | 0.18 | 0.60   | 1.23   |
|                              | TS-C1        | South West     | Cyclonic     | 0.02                                                | 0.12     | 0.15     | 0.77            | 0.68            | 0.36                         | 0.01            | 0.15 | 0.19 | 0.31 | 0.65   | 1.24   |
|                              | TS-C2        | North West     | Cyclonic     | 0.01                                                | 0.07     | 0.08     | 1.35            | 0.90            | 0.68                         | 0.06            | 0.09 | 0.12 | 0.18 | 0.50   | 0.84   |
| Summer                       | WS-ST        | Stagnating     | Anticyclonic | 0.04                                                | 0.21     | 0.17     | 1.01            | 1.88            | 0.71                         | 0.01            | 0.23 | 0.34 | 0.36 | 1.10   | 2.84   |
|                              | WS-A1        | South East     | Anticyclonic | 0.06                                                | 0.32     | 0.62     | 3.20            | 3.25            | 1.96                         | 0.10            | 0.34 | 0.51 | 1.28 | 2.15   | 3.11   |
|                              | WS-A2        | North West     | Anticyclonic | 0.03                                                | 0.14     | 0.21     | 2.22            | 1.63            | 1.09                         | 0.04            | 0.19 | 0.23 | 0.44 | 1.13   | 2.09   |
|                              | WS-C1        | West           | Cyclonic     | 0.03                                                | 0.16     | 0.15     | 1.63            | 1.86            | 0.90                         | 0.03            | 0.17 | 0.25 | 0.32 | 0.88   | 2.00   |
|                              | WS-C2        | West           | Cyclonic     | 0.01                                                | 0.08     | 0.07     | 0.83            | 1.20            | 0.51                         | 0.02            | 0.09 | 0.13 | 0.14 | 0.37   | 0.97   |

143  
144  
145

**Table. S6: Main statistical details of the fifteen air mass types for PM<sub>1</sub> PMF factors (CS=Cold Season, WS=Warm Season, ST=Stagnant, A=Anticyclonic, C=Cyclonic) based on contribution (%).**

| Main season               | Air mass type | Wind direction | Vorticity    | Average mass contribution (%) |          |          |                 |                 |                              |                 |     |      |      |        |        |
|---------------------------|---------------|----------------|--------------|-------------------------------|----------|----------|-----------------|-----------------|------------------------------|-----------------|-----|------|------|--------|--------|
|                           |               |                |              | eBC-HOA                       | eBC-BBOA | eBC-CCOA | NO <sub>x</sub> | SO <sub>2</sub> | NH <sub>4</sub> <sup>+</sup> | Cl <sup>-</sup> | HOA | BBOA | CCOA | LO_OOA | MO_OOA |
| Winter                    | CS-ST         | Stagnating     | Anticyclonic | 0                             | 3        | 4        | 25              | 15              | 13                           | 1               | 2   | 4    | 9    | 12     | 12     |
|                           | CS-A1         | East           | Anticyclonic | 0                             | 2        | 7        | 19              | 18              | 12                           | 1               | 2   | 4    | 14   | 9      | 12     |
|                           | CS-A2         | West           | Anticyclonic | 0                             | 2        | 2        | 29              | 14              | 14                           | 1               | 2   | 3    | 5    | 13     | 15     |
|                           | CS-C1         | South          | Cyclonic     | 0                             | 2        | 3        | 16              | 19              | 11                           | 0               | 2   | 4    | 5    | 14     | 24     |
|                           | CS-C2a        | South West     | Cyclonic     | 0                             | 2        | 2        | 28              | 19              | 14                           | 1               | 2   | 3    | 3    | 8      | 18     |
|                           | CS-C2b        | West           | Cyclonic     | 0                             | 2        | 2        | 14              | 29              | 10                           | 1               | 3   | 3    | 4    | 11     | 21     |
| Transition (Spring/ Fall) | TS-A1         | North East     | Anticyclonic | 0                             | 2        | 2        | 18              | 18              | 10                           | 1               | 3   | 3    | 4    | 17     | 22     |
|                           | TS-A2         | West           | Anticyclonic | 0                             | 2        | 1        | 26              | 18              | 13                           | 1               | 2   | 3    | 3    | 10     | 21     |
|                           | TS-C1         | South West     | Cyclonic     | 1                             | 3        | 3        | 17              | 14              | 8                            | 0               | 3   | 4    | 7    | 14     | 26     |
|                           | TS-C2         | North West     | Cyclonic     | 0                             | 2        | 2        | 27              | 18              | 14                           | 1               | 2   | 3    | 4    | 10     | 17     |
| Summer                    | WS-ST         | Stagnating     | Anticyclonic | 1                             | 1        | 2        | 11              | 21              | 8                            | 0               | 3   | 4    | 4    | 12     | 32     |
|                           | WS-A1         | South East     | Anticyclonic | 0                             | 2        | 4        | 19              | 19              | 11                           | 1               | 2   | 3    | 8    | 13     | 18     |
|                           | WS-A2         | North West     | Anticyclonic | 0                             | 2        | 2        | 23              | 17              | 12                           | 1               | 2   | 2    | 5    | 12     | 22     |
|                           | WS-C1         | West           | Cyclonic     | 0                             | 0        | 2        | 19              | 22              | 11                           | 0               | 2   | 3    | 4    | 11     | 24     |
|                           | WS-C2         | West           | Cyclonic     | 0                             | 2        | 2        | 19              | 27              | 11                           | 1               | 2   | 3    | 3    | 8      | 22     |

146

## 147 References

- 148 Canonaco, F., Tobler, A., Chen, G., Sosedova, Y., Gates Slowik, J., Bozzetti, C., Rudolf Daellenbach, K., el Haddad, I., Crippa,  
149 M., Huang, R. J., Furger, M., Baltensperger, U., and Prévôt, A. S. H.: A new method for long-term source apportionment  
150 with time-dependent factor profiles and uncertainty assessment using SoFi Pro: Application to 1 year of organic aerosol  
151 data, *Atmos. Meas. Tech.*, 14(2), 923–943, <https://doi.org/10.5194/amt-14-923-2021>, 2021.
- 152 Chen, G., Sosedova, Y., Canonaco, F., Fröhlich, R., Tobler, A., Vlachou, A., Daellenbach, K. R., Bozzetti, C., Hueglin, C.,  
153 Graf, P., Baltensperger, U., Slowik, J. G., el Haddad, I., and Prévôt, A. S. H.: Time-dependent source apportionment  
154 of submicron organic aerosol for a rural site in an alpine valley using a rolling positive matrix factorisation (PMF)  
155 window, *Atmos. Chem. Phys.*, 21(19), 15081–15101, <https://doi.org/10.5194/acp-21-15081-2021>, 2021.
- 156 Chen, G., Canonaco, F., Tobler, A., Aas, W., Alastuey, A., Allan, J., Atabakhsh, S., Aurela, M., Baltensperger, U.,  
157 Bougiatioti, A., de Brito, J. F., Ceburnis, D., Chazeau, B., Chebaicheb, H., Daellenbach, K. R., Ehn, M., el Haddad, I.,  
158 Eleftheriadis, K., Favez, O., Flentje, H., Font, A., Fossum, K., Freney, E., Gini, M., Green, D.C., Heikkinen, L.,  
159 Herrmann, H., Kalogridis, A., Keernik, H., Lhotka, R., Lin, C., Lunder, C., Maasikmets, M., Manousakas, M.I.,  
160 Marchand, N., Marin, C., Marmureanu, L., Mihalopoulos, N., Mocnika, G., Nęckia, J., O’Dowd, C., Ovadnevaite, J.,  
161 Petera, T., Petita, J.E., Pikridasa, M., Matthew Platt, S., Pokorna, P., Poulain, L., Priestman, M., Riffault, V., Rinaldia,  
162 M., Rozanskia, K., Schwarz, J., Sciarea, J., Simon, L., Skiba, A., Slowik, J.G., Sosedova, Y., Stavroulas, I., Styszkoa,  
163 K., Teinmaa, E., Timonen, H., Tremper, A., Vasilescu, J., Via, M., Vodicka, P., Wiedensohler, A., Zografou, O., Cruz  
164 Minguillon, M., and Prévôt, A. S. H.: European aerosol phenomenology – 8: Harmonised source apportionment of  
165 organic aerosol using 22 Year-long ACSM/AMS datasets, *Environment International*, 166,  
166 <https://doi.org/10.1016/j.envint.2022.107325>, 2022.
- 167 Crippa, M., Canonaco, F., Lanz, V. A., Äijälä, M., Allan, J. D., Carbone, S., Capes, G., Ceburnis, D., Dall’Osto, M., Day,  
168 D. A., DeCarlo, P. F., Ehn, M., Eriksson, A., Freney, E., Ruiz, L. H., Hillamo, R., Jimenez, J. L., Junninen, H., Kiendler-  
169 Scharr, A., Kortelainen, A.-M., Kulmala, M., Laaksonen, A., Mensah10, A.A., Mohr1, C., Nemitz, E., O’Dowd, C.,

170 Ovadnevaite, J., Pandis, S. N., Petäjä, T., Poulain, L., Saarikoski, S., Sellegri, K., Swietlicki, E., Tiitta, P., Worsnop, D.  
171 R., Baltensperger, U., and Prévôt, A. S. H.: Organic aerosol components derived from 25 AMS data sets across Europe  
172 using a consistent ME-2 based source apportionment approach, *Atmos. Chem. Phys.*, 14(12), 6159–6176,  
173 <https://doi.org/10.5194/acp-14-6159-2014>, 2014.

174 Crippa, M., Decarlo, P. F., Slowik, J. G., Mohr, C., Heringa, M. F., Chirico, R., Poulain, L., Freutel, F., Sciare, J., Cozic, J.,  
175 di Marco, C. F., Elsasser, M., Nicolas, J. B., Marchand, N., Abidi, E., Wiedensohler, A., Drewnick, F., Schneider, J.,  
176 Borrmann, S., Nemitz, E., Zimmermann, R., Jaffrezo, J.-L., Prevot, A. S. H., and Baltensperger, U. Wintertime aerosol  
177 chemical composition and source apportionment of the organic fraction in the metropolitan area of Paris, *Atmos. Chem.*  
178 *Phys.*, 13(2), 961–981, <https://doi.org/10.5194/acp-13-961-2013>, 2013.

179 Dall’Osto, M., Ovadnevaite, J., Ceburnis, D., Martin, D., Healy, R. M., O’Connor, I. P., Kourtchev, I., Sodeau, J. R., Wenger,  
180 J. C., and O’Dowd, C.: Characterization of urban aerosol in Cork city (Ireland) using aerosol mass spectrometry, *Atmos.*  
181 *Chem. Phys.*, 13(9), 4997–5015, <https://doi.org/10.5194/acp-13-4997-2013>, 2013.

182 Davison, A. C., and Hinkley, D. V.: *Bootstrap methods and their application*, Cambridge University Press, 1997.

183 Elser, M., Huang, R. J., Wolf, R., Slowik, J. G., Wang, Q., Canonaco, F., Li, G., Bozzetti, C., Daellenbach, K. R., Huang, Y.,  
184 Zhang, R., Li, Z., Cao, J., Baltensperger, U., El-Haddad, I., and André, P.: New insights into PM<sub>2.5</sub> chemical  
185 composition and sources in two major cities in China during extreme haze events using aerosol mass spectrometry,  
186 *Atmos. Chem. Phys.*, 16(5), 3207–3225, <https://doi.org/10.5194/acp-16-3207-2016>, 2016.

187 Lin, C., Ceburnis, D., Hellebust, S., Buckley, P., Wenger, J., Canonaco, F., Prévôt, A. S. H., Huang, R. J., O’Dowd, C., and  
188 Ovadnevaite, J.: Characterization of Primary Organic Aerosol from Domestic Wood, Peat, and Coal Burning in Ireland,  
189 *Environ. Sci. Technol.*, 51(18), 10624–10632, <https://doi.org/10.1021/acs.est.7b01926>, 2017.

190 Ng, N. L., Canagaratna, M. R., Jimenez, J. L., Zhang, Q., Ulbrich, I. M., and Worsnop, D. R.: Real-time methods for  
191 estimating organic component mass concentrations from aerosol mass spectrometer data, *Environ. Sci. Technol.*, 45(3),  
192 910–916. <https://doi.org/10.1021/es102951k>, 2011.

193 Ng, N. L., Canagaratna, M. R., Zhang, Q., Jimenez, J. L., Tian, J., Ulbrich, I. M., Kroll, J. H., Docherty, K. S., Chhabra, P.  
194 S., Bahreini, R., Murphy, S. M., Seinfeld, J. H., Hildebrandt, L., Donahue, N. M., Decarlo, P. F., Lanz, V. A., Prévôt,  
195 A. S. H., Dinar, E., Rudich, Y., and Worsnop, D. R.: Organic aerosol components observed in Northern Hemispheric  
196 datasets from Aerosol Mass Spectrometry, *Atmos. Chem. Phys.*, 10(10), 4625–4641, [https://doi.org/10.5194/acp-10-](https://doi.org/10.5194/acp-10-4625-2010)  
197 [4625-2010](https://doi.org/10.5194/acp-10-4625-2010), 2010.

198 Poulain, L., Spindler, G., Birmili, W., Plass-Dülmer, C., Wiedensohler, A., and Herrmann, H.: Seasonal and diurnal variations  
199 of particulate nitrate and organic matter at the IfT research station Melpitz, *Atmos. Chem. Phys.*, 11(24), 12579–12599.  
200 <https://doi.org/10.5194/acp-11-12579-2011>, 2011.

201 van Pinxteren, D., Fomba, K. W., Spindler, G., Müller, K., Poulain, L., Iinuma, Y., Löschau, G., Hausmann, A., and  
202 Herrmann, H.: Regional air quality in Leipzig, Germany: Detailed source apportionment of size-resolved aerosol

203 particles and comparison with the year 2000, Faraday Discussions, 189, 291–315, <https://doi.org/10.1039/c5fd00228a>,  
204 2016.

205 van Pinxteren, D., Mothes, F., Spindler, G., Fomba, K. W., Cuesta, A., Tuch, T., Müller, T., Wiedensohler, A., and Herrmann,  
206 H.: Zusatzbelastung aus Holzheizung, Sächsisches Landesamt für Umwelt, Landwirtschaft und Geologie (LfULG),  
207 Dresden, <https://publikationen.sachsen.de/bdb/artikel/36106> TS33 , 2020.

208
